# Supplementary material for: Exploration of Microbially Derived Natural Compounds against Monkeypox Virus as Viral Core Cysteine Proteinase Inhibitors
Source: MDPI journal article supplement (doi:10.3390/v15010251), 2023-01-16
Supplement: s1 [file s1]

## Identification of potential inhibitor from NP-ATLAS Database against Monkeypox Proteinase

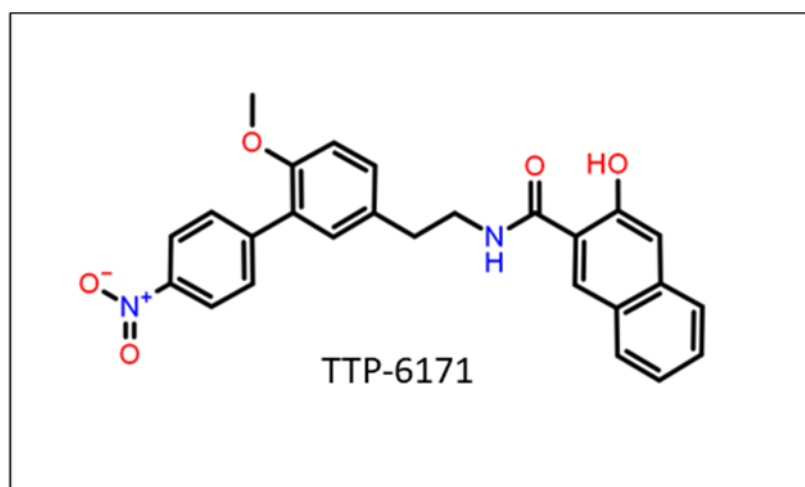

**Figure S1.** 2D structure representation of the native ligand (TTP-6171).

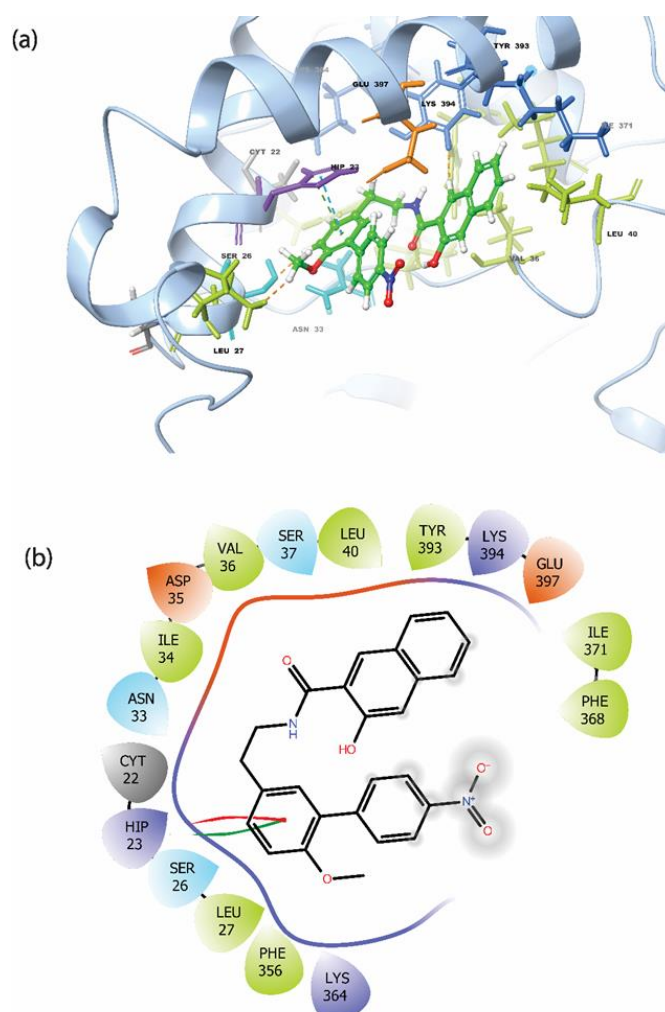

**Figure S2.** The viral protein structural interaction with its native ligand TTP-6171 in (a) 3D and (b) 2D format.

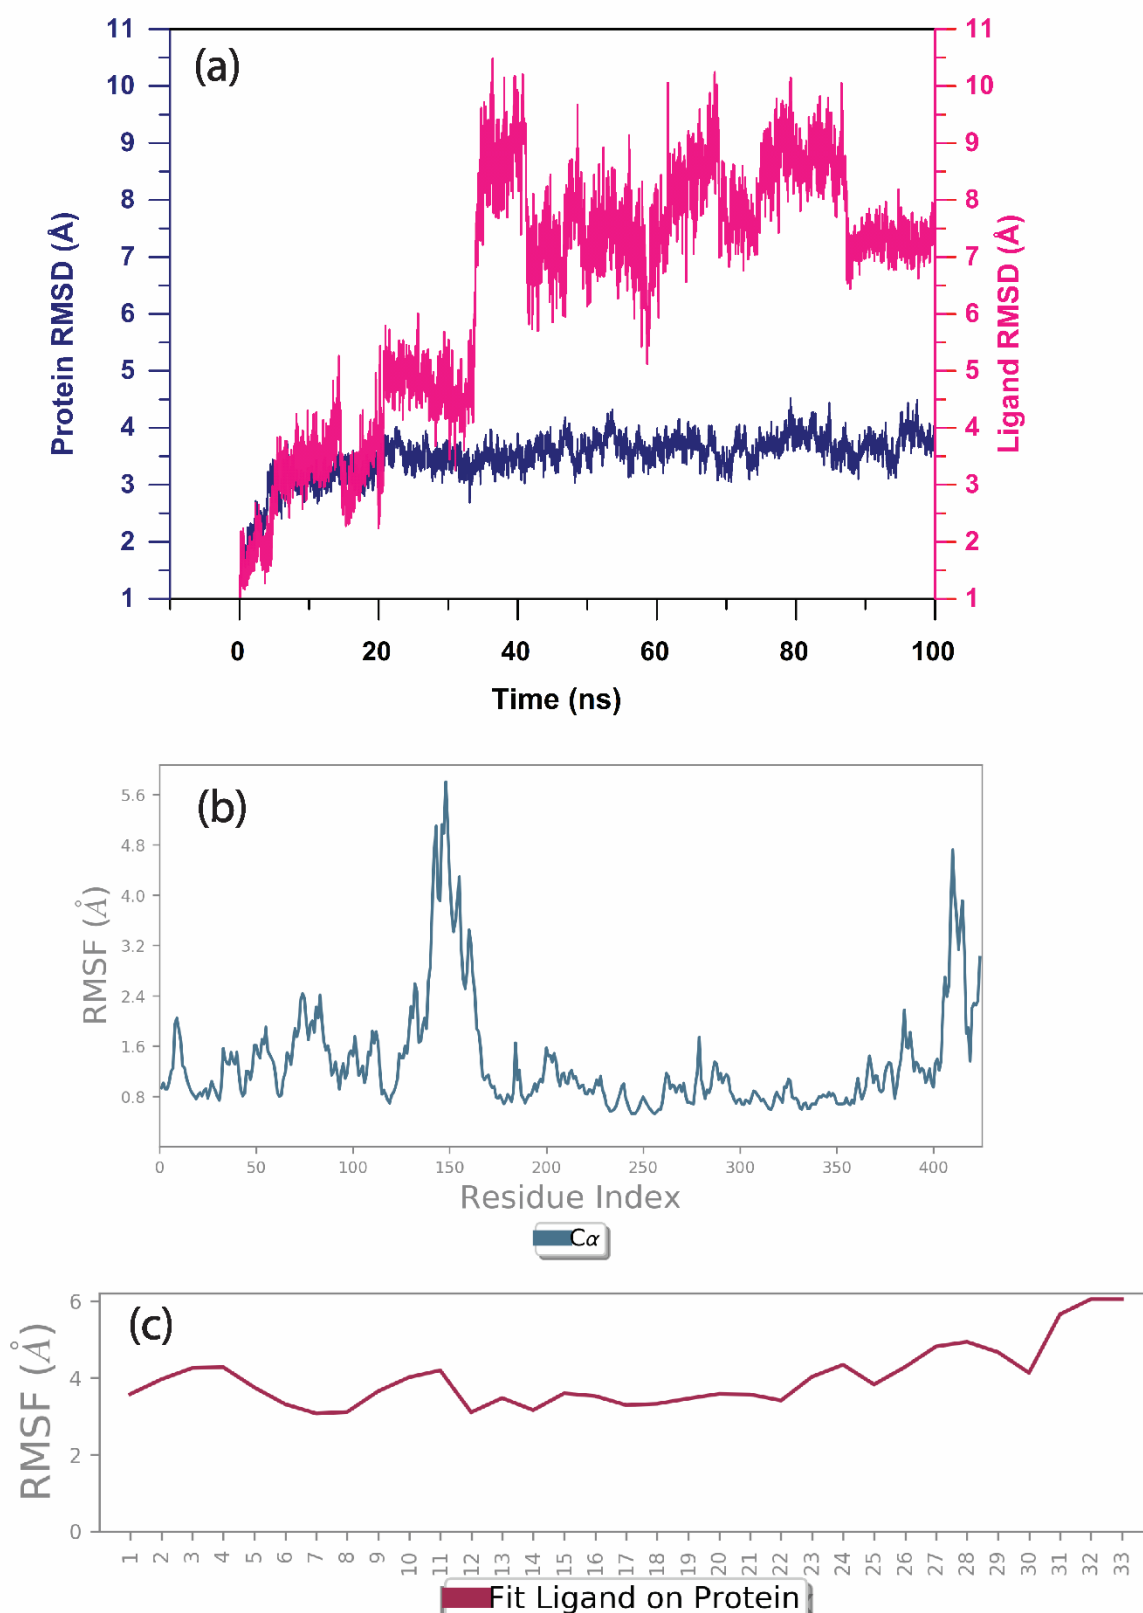

**Figure S3.** (a) RMSD of the viral protein with respect to its native ligand (b) RMSF of the viral protein from the protein-native ligand complex (c) RMSF of the ligand from the protein-native ligand complex.

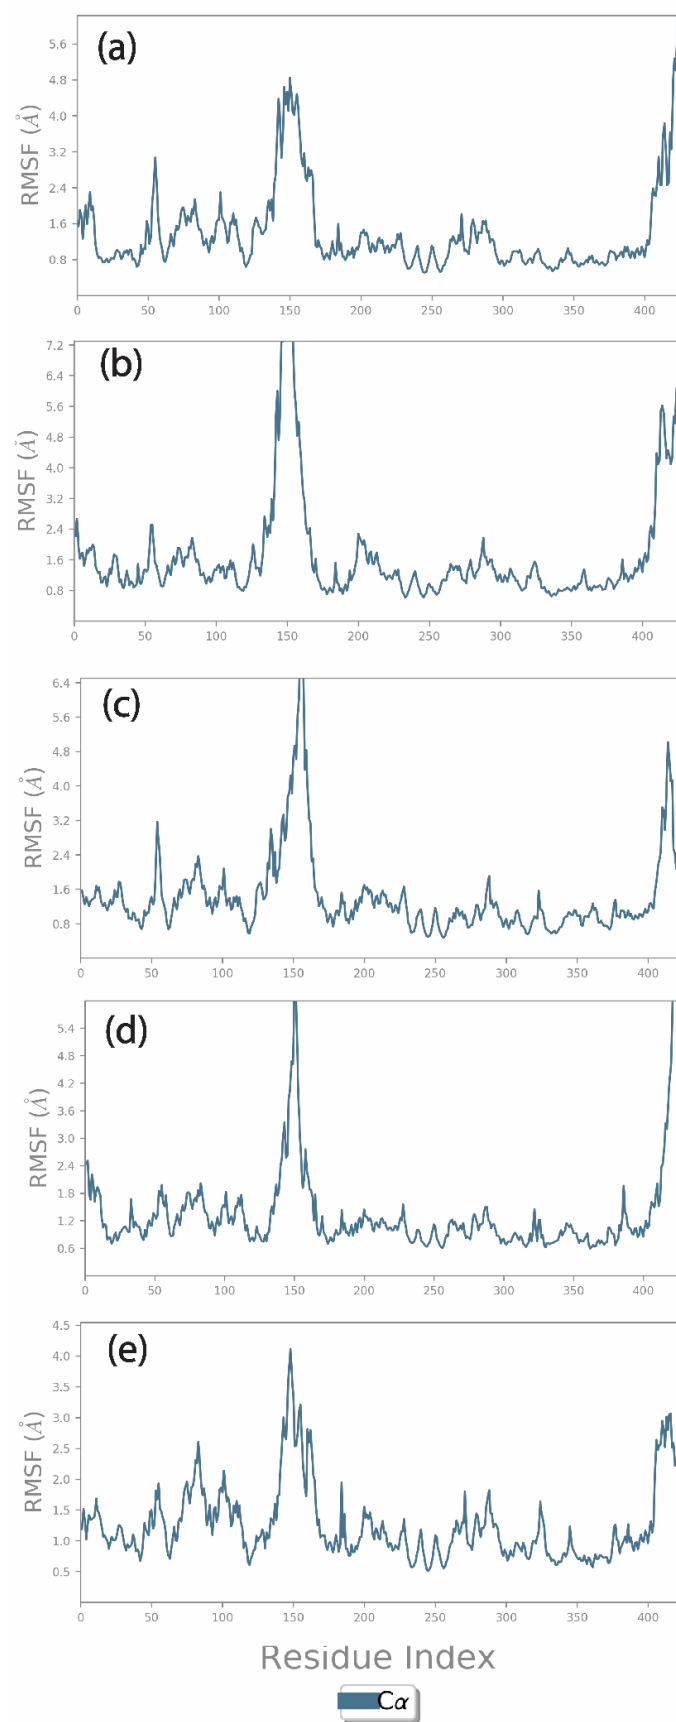

**Figure S4.** RMSF of the viral protein from the protein-native ligand complex (a) Gallicynoic Acid F (b) H2 Erythro-Neopterin (c) Nigcollin C (d) NPA024545 (e) Vaccinol M extracted from the total 100 ns MD simulation

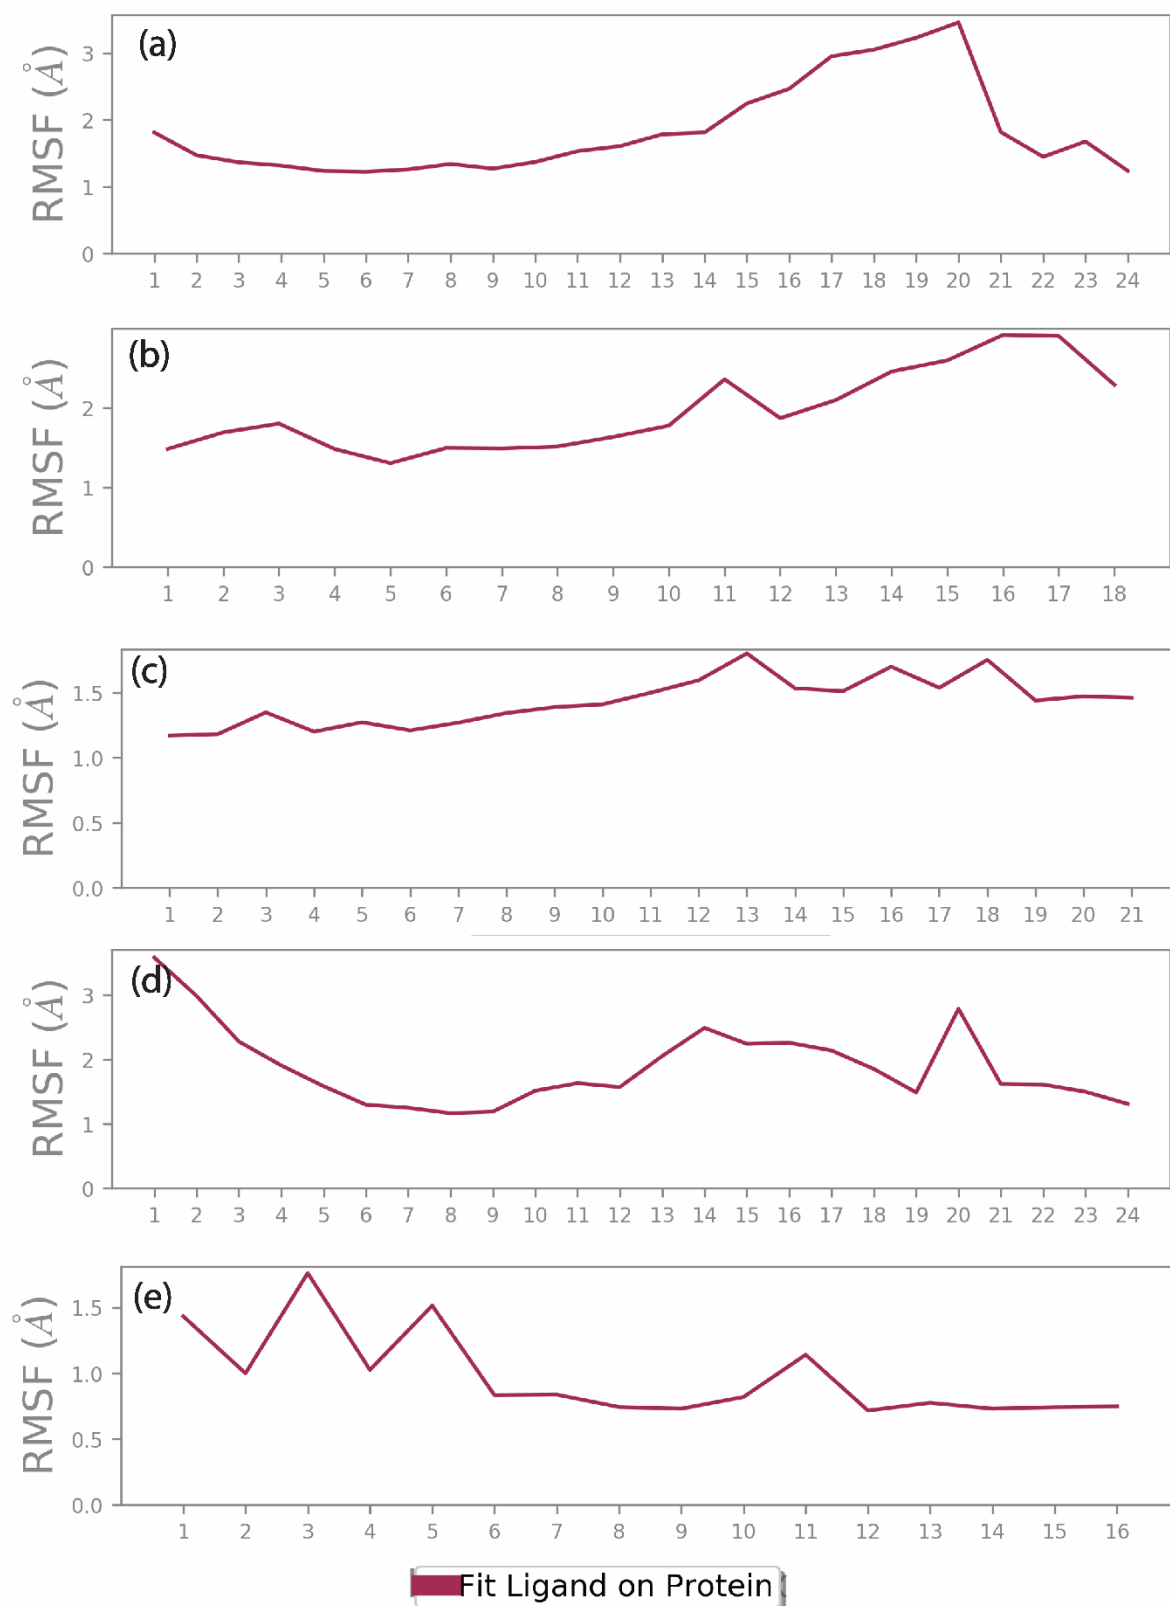

**Figure S5.** RMSF of the ligand from the protein-native ligand complex (a)Gallicynoic Acid F (b) H2 Erythro-Neopterin (c) Nigcollin C (d) NPA024545 (e) Vaccinol M extracted from the total 100 ns MD simulation

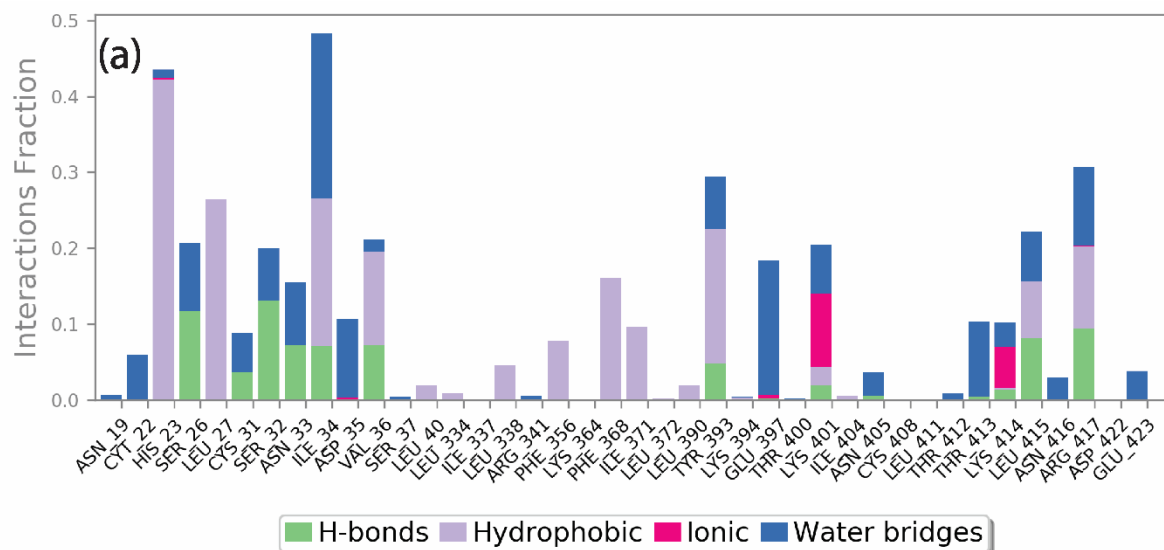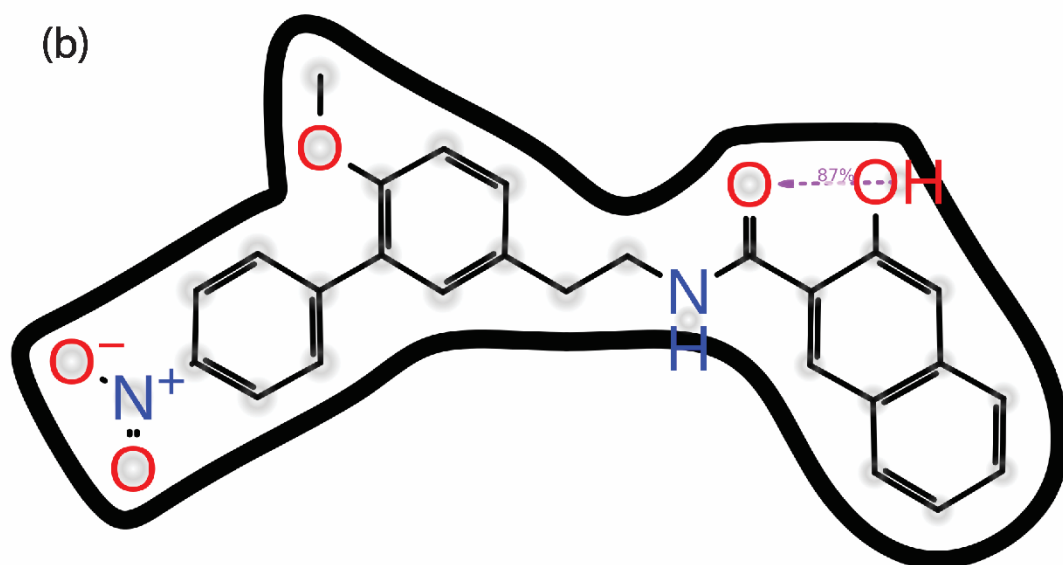

**Figure S6.** (a) Protein-ligand contact mapping of the protein-native ligand complex, (b) Ligand-Protein interaction profiling extracted from 100 ns simulation time

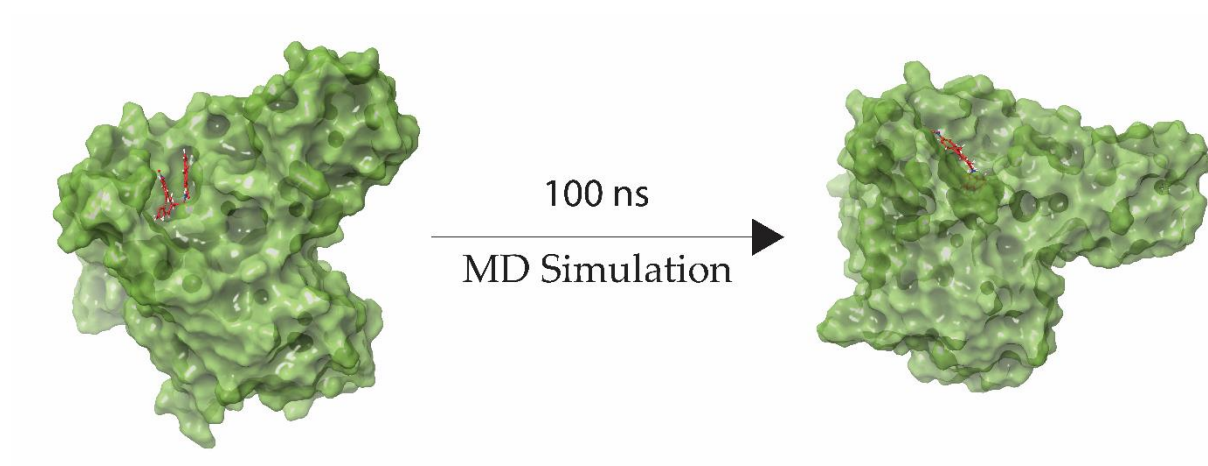

**Figure S7.** First and last pose of the protein-native ligand complex extracted from 100ns simulation.

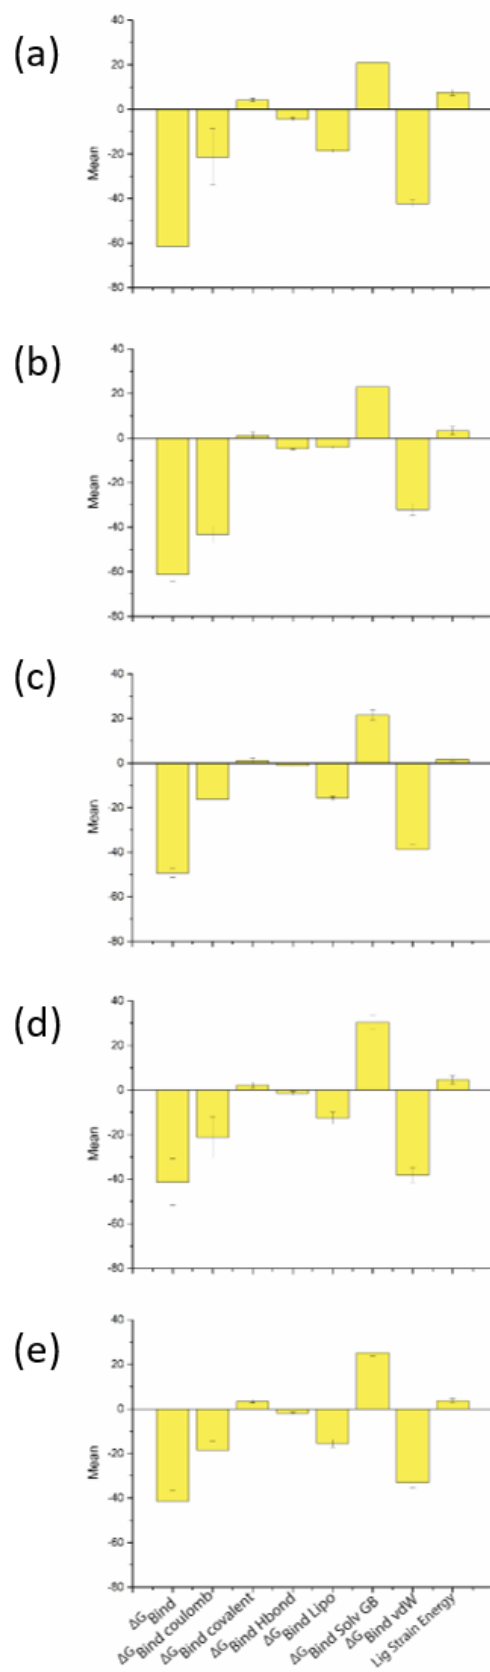

**Figure S8.** Graphical representation of free binding energy of the selected natural compounds, (a) Gallicynoic Acid F, (b) H2-Erythro-Neopterin, (c) Nigcollin C, (d) NPA024545, (e) Vaccinol M

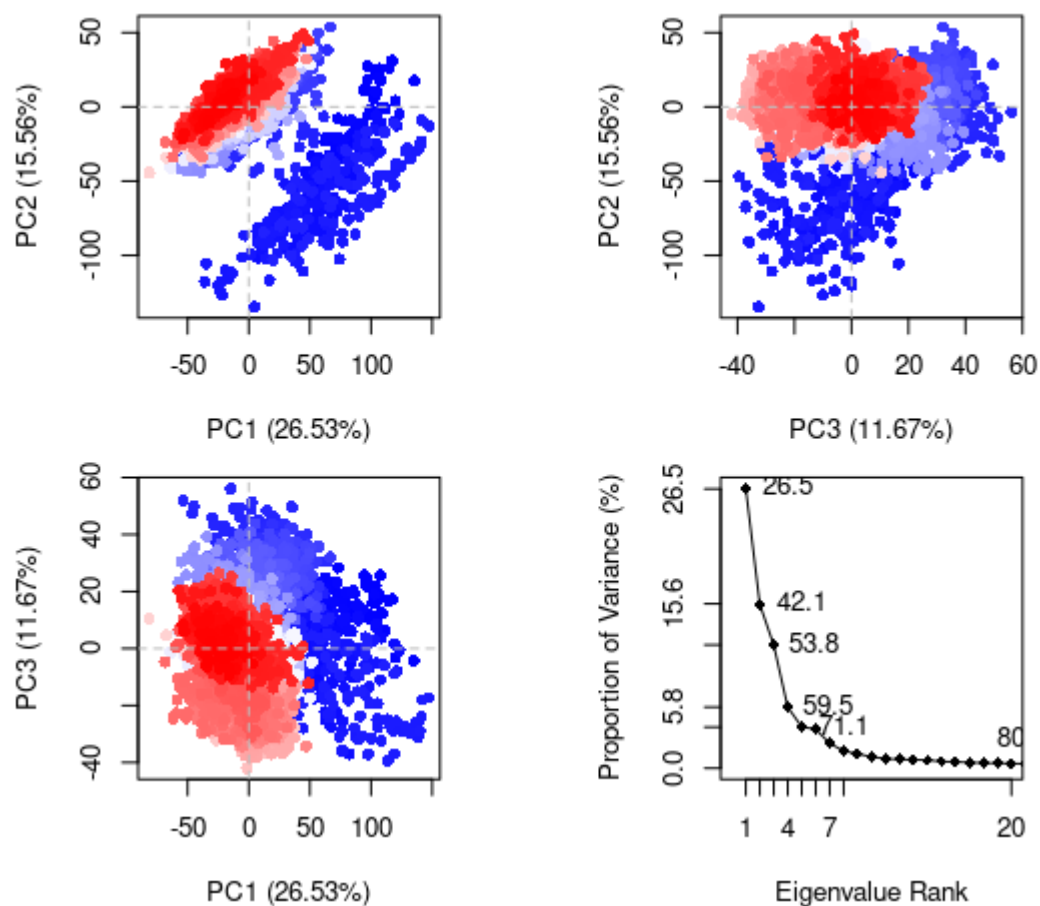

**Figure S9.** Principal component analysis of the protein-native ligand complex extracted from 100ns simulation.

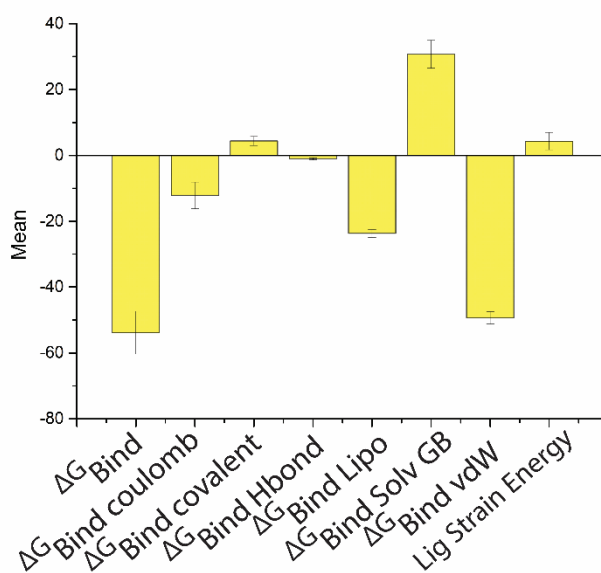

**Figure S10.** Free binding energy calculation of protein-native ligand complex
